# Supplementary material
Source: PubMed Central journal article supplement (PMC2966135)
Supplement: supp_M110.167064_jbc.M110.167064-1.pdf [file supp_M110.167064_jbc.M110.167064-1.pdf]

| Mutation site      | Final Estimate |        |       |        |       | p-value               |                              |
|--------------------|----------------|--------|-------|--------|-------|-----------------------|------------------------------|
|                    | Mean           | s.e.m. | 0.025 | Median | 0.975 | $K^{mut} \neq K^{wt}$ | $K^{mut} > K^{wt} \times 10$ |
| $t_{max}$          |                |        |       |        |       |                       |                              |
| <i>All species</i> | 90.52          | 0.96   | 88.69 | 90.50  | 92.49 | -                     | -                            |
| $K^C_P$            |                |        |       |        |       |                       |                              |
| Wild-type          | 0.83           | 0.05   | 0.74  | 0.83   | 0.94  | -                     | -                            |
| T166               | 0.90           | 0.16   | 0.60  | 0.90   | 1.24  | 0.68300               | 1.00000                      |
| E167               | 0.93           | 0.19   | 0.57  | 0.92   | 1.32  | 0.63300               | 1.00000                      |
| I168               | 4.49           | 0.43   | 3.69  | 4.47   | 5.39  | < 0.00001             | 1.00000                      |
| K169               | 0.82           | 0.15   | 0.54  | 0.82   | 1.12  | 0.90280               | 1.00000                      |
| E170               | 0.61           | 0.15   | 0.33  | 0.61   | 0.92  | 0.14104               | 1.00000                      |
| D171               | 1.23           | 0.18   | 0.90  | 1.23   | 1.60  | 0.01580               | 1.00000                      |
| L172               | 3.49           | 0.43   | 2.73  | 3.45   | 4.42  | < 0.00001             | 1.00000                      |
| E173               | 0.57           | 0.11   | 0.36  | 0.57   | 0.80  | 0.02460               | 1.00000                      |
| E174               | 1.64           | 0.20   | 1.26  | 1.63   | 2.04  | < 0.00001             | 1.00000                      |
| Y187               | 1.27           | 0.21   | 0.87  | 1.27   | 1.71  | 0.02322               | 1.00000                      |
| K188               | 0.99           | 0.15   | 0.70  | 0.98   | 1.30  | 0.28920               | 1.00000                      |
| Y189               | 0.94           | 0.14   | 0.69  | 0.94   | 1.22  | 0.40560               | 1.00000                      |
| N190               | 1.09           | 0.16   | 0.79  | 1.09   | 1.42  | 0.08304               | 1.00000                      |
| S191               | 1.00           | 0.13   | 0.75  | 1.00   | 1.28  | 0.18574               | 1.00000                      |
| S192               | 0.55           | 0.13   | 0.31  | 0.55   | 0.81  | 0.02712               | 1.00000                      |
| Y193               | 1.42           | 0.22   | 1.02  | 1.41   | 1.87  | 0.00249               | 1.00000                      |
| T194               | 0.60           | 0.19   | 0.24  | 0.60   | 0.99  | 0.20540               | 1.00000                      |
| R195               | 1.02           | 0.22   | 0.61  | 1.01   | 1.46  | 0.39320               | 1.00000                      |
| Q196               | 1.14           | 0.21   | 0.75  | 1.14   | 1.57  | 0.11480               | 1.00000                      |
| A197               | 0.83           | 0.18   | 0.49  | 0.83   | 1.21  | 0.97680               | 1.00000                      |
| G198               | 0.74           | 0.18   | 0.41  | 0.73   | 1.10  | 0.55380               | 1.00000                      |
| G199               | 0.91           | 0.20   | 0.54  | 0.91   | 1.32  | 0.70200               | 1.00000                      |
| S232               | 0.81           | 0.16   | 0.51  | 0.80   | 1.13  | 0.83220               | 1.00000                      |
| A233               | 1.24           | 0.22   | 0.82  | 1.23   | 1.69  | 0.04818               | 1.00000                      |
| S234               | 0.74           | 0.14   | 0.47  | 0.74   | 1.03  | 0.48560               | 1.00000                      |
| S235               | 0.77           | 0.15   | 0.49  | 0.76   | 1.07  | 0.62280               | 1.00000                      |
| S236               | 0.96           | 0.16   | 0.66  | 0.96   | 1.29  | 0.40560               | 1.00000                      |
| V237               | 1.19           | 0.23   | 0.75  | 1.18   | 1.66  | 0.10406               | 1.00000                      |
| R238               | 0.51           | 0.10   | 0.32  | 0.51   | 0.72  | 0.00260               | 1.00000                      |
| D239               | 1.88           | 0.24   | 1.44  | 1.87   | 2.35  | < 0.00001             | 1.00000                      |
| N240               | 2.64           | 0.28   | 2.11  | 2.63   | 3.22  | < 0.00001             | 1.00000                      |
| N241               | 3.64           | 0.34   | 3.01  | 3.63   | 4.34  | < 0.00001             | 1.00000                      |
| P242               | 2.41           | 0.30   | 1.85  | 2.39   | 3.03  | < 0.00001             | 1.00000                      |
| Q243               | 1.22           | 0.19   | 0.86  | 1.21   | 1.60  | 0.02444               | 1.00000                      |
| V244               | 1.84           | 0.20   | 1.47  | 1.83   | 2.26  | < 0.00001             | 1.00000                      |
| D245               | 6.10           | 0.57   | 5.07  | 6.08   | 7.30  | < 0.00001             | 0.99880                      |
| R246               | 0.41           | 0.10   | 0.21  | 0.41   | 0.62  | 0.00009               | 1.00000                      |
| K247               | 4.65           | 0.42   | 3.89  | 4.63   | 5.54  | < 0.00001             | 1.00000                      |
| D248               | 0.87           | 0.16   | 0.56  | 0.86   | 1.19  | 0.84740               | 1.00000                      |
| K250               | 2.55           | 0.25   | 2.09  | 2.54   | 3.07  | < 0.00001             | 1.00000                      |
| I251               | 0.84           | 0.21   | 0.45  | 0.84   | 1.27  | 0.99640               | 1.00000                      |
| G252               | 32.33          | 8.39   | 21.26 | 30.79  | 52.37 | < 0.00001             | < 0.00001                    |
| F253               | 0.91           | 0.21   | 0.50  | 0.90   | 1.34  | 0.74080               | 1.00000                      |
| Q254               | 5.41           | 0.70   | 4.21  | 5.36   | 6.94  | < 0.00001             | 0.99920                      |
| L255               | 12.99          | 1.06   | 11.04 | 12.93  | 15.22 | < 0.00001             | < 0.00001                    |
| C256               | 5.08           | 0.47   | 4.24  | 5.06   | 6.06  | < 0.00001             | 1.00000                      |
| N257               | 1.57           | 0.18   | 1.23  | 1.56   | 1.94  | < 0.00001             | 1.00000                      |
| Q258               | 0.59           | 0.13   | 0.35  | 0.58   | 0.85  | 0.04794               | 1.00000                      |
| N259               | 0.47           | 0.13   | 0.23  | 0.47   | 0.74  | 0.00627               | 1.00000                      |
| K260               | 0.43           | 0.10   | 0.24  | 0.42   | 0.64  | 0.00041               | 1.00000                      |
| S261               | 0.83           | 0.13   | 0.58  | 0.83   | 1.10  | 0.96420               | 1.00000                      |
| D262               | 1.60           | 0.19   | 1.25  | 1.60   | 1.98  | < 0.00001             | 1.00000                      |
| C263               | 2.77           | 0.27   | 2.28  | 2.77   | 3.33  | < 0.00001             | 1.00000                      |
| F264               | 3.39           | 0.36   | 2.73  | 3.37   | 4.13  | < 0.00001             | 1.00000                      |
| Y265               | 1.91           | 0.26   | 1.42  | 1.90   | 2.45  | < 0.00001             | 1.00000                      |
| Q266               | 6.94           | 0.60   | 5.84  | 6.91   | 8.17  | < 0.00001             | 0.97490                      |
| T267               | 35.77          | 1.60   | 22.82 | 33.67  | 60.80 | < 0.00001             | < 0.00001                    |
| Y268               | 1.76           | 0.37   | 1.13  | 1.73   | 2.55  | 0.00178               | 1.00000                      |
| S269               | 6.01           | 0.63   | 4.85  | 5.99   | 7.33  | < 0.00001             | 0.99860                      |
| S270               | 4.62           | 0.52   | 3.67  | 4.59   | 5.70  | < 0.00001             | 1.00000                      |
| G271               | 8.05           | 0.82   | 6.55  | 8.01   | 9.77  | < 0.00001             | 0.64330                      |
| V272               | 4.48           | 0.43   | 3.68  | 4.46   | 5.38  | < 0.00001             | 1.00000                      |

|      |       |      |       |       |       |           |           |
|------|-------|------|-------|-------|-------|-----------|-----------|
| D273 | 2.21  | 0.28 | 1.69  | 2.20  | 2.81  | < 0.00001 | 1.00000   |
| A274 | 14.38 | 1.65 | 11.46 | 14.26 | 17.93 | < 0.00001 | < 0.00001 |
| V275 | 9.29  | 1.07 | 7.40  | 9.22  | 11.61 | < 0.00001 | 0.20300   |
| R276 | 3.09  | 0.63 | 1.99  | 3.04  | 4.46  | < 0.00001 | 1.00000   |
| E277 | 0.40  | 0.21 | 0.04  | 0.39  | 0.85  | 0.04752   | 1.00000   |
| Y279 | 1.28  | 0.16 | 0.99  | 1.28  | 1.63  | 0.00156   | 1.00000   |
| R280 | 3.48  | 0.36 | 2.82  | 3.47  | 4.23  | < 0.00001 | 1.00000   |
| F281 | 4.00  | 0.43 | 3.19  | 3.99  | 4.89  | < 0.00001 | 1.00000   |
| H282 | 5.50  | 0.55 | 4.48  | 5.48  | 6.64  | < 0.00001 | 1.00000   |
| Y283 | 1.22  | 0.27 | 0.72  | 1.21  | 1.77  | 0.12310   | 1.00000   |
| I284 | 1.05  | 0.17 | 0.73  | 1.04  | 1.40  | 0.19244   | 1.00000   |
| N285 | 15.74 | 1.56 | 12.95 | 15.64 | 19.07 | < 0.00001 | < 0.00001 |
| I286 | 3.31  | 0.50 | 2.41  | 3.29  | 4.36  | < 0.00001 | 1.00000   |
| L287 | 1.80  | 0.31 | 1.24  | 1.79  | 2.44  | 0.00031   | 1.00000   |
| S288 | 2.88  | 0.35 | 2.24  | 2.87  | 3.61  | < 0.00001 | 1.00000   |
| R289 | 12.61 | 2.16 | 9.16  | 12.35 | 17.58 | < 0.00001 | 0.00600   |
| L290 | 1.30  | 0.30 | 0.74  | 1.29  | 1.93  | 0.10120   | 1.00000   |
| P291 | 1.07  | 0.22 | 0.66  | 1.07  | 1.52  | 0.25520   | 1.00000   |
| D292 | 1.11  | 0.21 | 0.72  | 1.10  | 1.53  | 0.15954   | 1.00000   |
| T293 | 0.55  | 0.15 | 0.26  | 0.54  | 0.86  | 0.06464   | 1.00000   |
| S294 | 1.11  | 0.23 | 0.68  | 1.10  | 1.58  | 0.21800   | 1.00000   |
| P295 | 0.91  | 0.19 | 0.56  | 0.91  | 1.30  | 0.68880   | 1.00000   |
| P466 | 1.20  | 0.27 | 0.69  | 1.19  | 1.76  | 0.16204   | 1.00000   |
| K467 | 0.69  | 0.18 | 0.36  | 0.69  | 1.06  | 0.40380   | 1.00000   |
| G468 | 0.60  | 0.17 | 0.28  | 0.60  | 0.96  | 0.16758   | 1.00000   |
| V469 | 0.77  | 0.16 | 0.46  | 0.76  | 1.10  | 0.64160   | 1.00000   |
| E470 | 1.77  | 0.20 | 1.39  | 1.76  | 2.17  | < 0.00001 | 1.00000   |
| F471 | 1.57  | 0.21 | 1.17  | 1.57  | 2.02  | 0.00006   | 1.00000   |
| D473 | 2.20  | 0.27 | 1.71  | 2.19  | 2.75  | < 0.00001 | 1.00000   |
| Y474 | 0.98  | 0.18 | 0.64  | 0.97  | 1.35  | 0.40880   | 1.00000   |
| L475 | 0.34  | 0.17 | 0.05  | 0.33  | 0.71  | 0.00932   | 1.00000   |
| K476 | 0.96  | 0.20 | 0.59  | 0.96  | 1.39  | 0.52680   | 1.00000   |
| Q477 | 0.60  | 0.18 | 0.26  | 0.59  | 0.96  | 0.17644   | 1.00000   |
| S478 | 0.57  | 0.17 | 0.24  | 0.56  | 0.91  | 0.10620   | 1.00000   |
| S479 | 0.78  | 0.16 | 0.48  | 0.78  | 1.11  | 0.72540   | 1.00000   |
| G481 | 1.16  | 0.23 | 0.73  | 1.15  | 1.66  | 0.14178   | 1.00000   |
| Y482 | 0.27  | 0.14 | 0.03  | 0.27  | 0.58  | 0.00042   | 1.00000   |
| Y484 | 0.26  | 0.15 | 0.02  | 0.25  | 0.58  | 0.00044   | 1.00000   |
| Y485 | 1.64  | 0.32 | 1.04  | 1.63  | 2.30  | 0.00567   | 1.00000   |
| K486 | 0.41  | 0.22 | 0.04  | 0.39  | 0.89  | 0.06572   | 1.00000   |
| L487 | 0.87  | 0.24 | 0.41  | 0.87  | 1.37  | 0.89120   | 1.00000   |

Table S1. Parameters for NLMR model analysis of P8 inhibition vs. Na<sup>+</sup> self-inhibition for wild-type and mutant channels.
